# Supplementary material for: Health Impact Assessments in Spain: Have They Been Effective?
Source: MDPI journal article supplement (doi:10.3390/ijerph17082959), 2020-04-24
Supplement: s1 [file s1]

## Additional File 1. Interview Guide

### I. CONTEXT

---

1.a. The following aspects about the decision-making were described and taken in consideration within the HIA?

- the general governance
- the sociopolitical context
- historical or recent relevant events

1.b. For each of the following aspects, answer:

| ASPECTS                              | How was it for HIA effectiveness? |            |                   |             | Why? |
|--------------------------------------|-----------------------------------|------------|-------------------|-------------|------|
|                                      | Very favourable                   | Favourable | Not so favourable | Unfavorable |      |
| The governance context               |                                   |            |                   |             |      |
| The sociopolitical context           |                                   |            |                   |             |      |
| Historical or recent relevant events |                                   |            |                   |             |      |

2. HIA values,

Which were the values? Were they explicit?

Did they determine the HIA development? How?

3.The purpose and objectives of HIA

What were the purpose and objectives of HIA? Were they explicit?

Were they met? If not, or partially only, what was/were the reason/s?

4.a. Did HIA respond to a legal or any other mandatory request or was developed on a voluntary basis?

4.b. If HIA was developed on a voluntary basis, which was the window of opportunity?

5.At which stage of the planning process HIA was developed?

At his point, was it feasible to have an impact on the decision-making?

## **II. PROCESS**

---

5. Was there a clear description of the intervention subject to HIA?
6. In the HIA team
  - ... were there experts in social determinants of health and health inequalities?
  - ... were there experts in HIA development?
  - ... were there experts in the proposal arena?
  - ...were there people with capacity to influence in the implementation of recommendations? How?
7. What were the implications of each of the following aspects for the HIA effectiveness?
  - a. The resources availability for the HIA
  - b. An initial agreement between the people/institutions promoting HIA and those responsible of the intervention to undertake the HIA
  - c. A formal development of HIA stages in accordance with the HIA guidelines structure
  - d. An evidence-based process
8. Did the HIA strengthen the relationship between sectors (public health sector and urbanism sector)?

If yes, how?

If not, why?
9. What were the implications of intersectoral work for the HIA effectiveness?
10. A participatory process was carried on within the HIA?

If not, why?

If yes, which population groups were invited? How did they participate? Did this participatory feature have implications for the HIA effectiveness? How?
11. Did the HIA improve the transparency of decision-making?

If yes, how?

## **III. IMPACTS**

---

12. Was the HIA successful in informing the decision-making process?

If yes, how?

If not, why?

13. Was the HIA successful in changing any aspect of the intervention design or implementation?

If yes, how?

If not, why?

14. Was the HIA successful in modifying the social determinants of health?

If yes, how?

If not, why?

15. Did the HIA meet its goals?

If yes, how?

If not, why?

16.a. Did the HIA enable to share, understand and address the other sectors specific aspects, such as the working style, priorities, pressures and worries?

16.b. Did the HIA enable to understand the planning process characteristics?

17. Did the HIA enable to improve knowledge among the people involved in about social model of health, health impacts and health inequalities-related aspects?

If yes, how?

If not, why?

18. Did the HIA enable to improve technical knowledge –about the HIA tool and public health-related methodologies?

If yes, how?

If not, why?

19. Did the HIA enable to improve skills to intersectoral action for health?

If yes, how?

If not, why?

20. Did the HIA catalyze any indirect impact on any other intervention, decision-making or intersectoral action for health process?

If yes, how?

#### **IV. CROSS-CUTTING ISSUES**

---

21. What were the implications of each of the following aspects for the HIA effectiveness?

- The time to do the HIA
- The timing of the HIA
- The proactive attitude of the people promoting and developing the HIA
